# Supplementary material
Source: publisher figshare collection journal article supplement (https://tandf.figshare.com/articles/dataset/_/5033405)
Supplement: Supplementary file 1 [file 1]

# Supplementary Material for “A Robust Model-Free Feature Screening Method for Ultrahigh-Dimensional Data” by J. Xue and F. Liang

Jingnan Xue and Faming Liang\*

February 9, 2017

## 1. Gene screening results by HZ-SIS for the rest 22 drugs.

Table 1: Top 10 genes selected by HZ-SIS for the rest 22 drugs.

| Rank    | Nilotinib  | AEW541    | AZD0530   | AZD6244      | Erlotinib |
|---------|------------|-----------|-----------|--------------|-----------|
| 1       | ARID1B     | UST       | DMKN      | DUSP6        | SYTL1     |
| 2       | WWTR1      | INSR      | FGFBP1    | ITGA6        | DAPP1     |
| 3       | FAM129B    | TCEAL4    | CLDN15    | ETV4         | PTPN6     |
| 4       | DAPK3      | WBP5      | SMAP2     | UCHL1        | ARHGAP27  |
| 5       | ARHGAP29   | TRIP10    | POU3F2    | PHLDA1       | TSTD1     |
| 6       | GPRC5A     | MIER3     | GRHL2     | NPAS2        | PSD4      |
| 7       | LAPTM4A    | SLFN12    | RHOD      | LOC100131096 | TIMP1     |
| 8       | CTNNA1     | GPD2      | APOO      | SH3TC2       | SH2D3A    |
| 9       | WBP5       | MID2      | FAM189B   | RNF125       | REL       |
| 10      | C7orf29    | LOC151534 | RASSF6    | DCLK2        | TMPRSS4   |
| TAE684  | Irinotecan | L-685458  | Lapatinib | LBW242       | ZD-6474   |
| PPP2R3A | ARHGAP19   | TGFB1     | CRB3      | KRTAP4-6     | TIMP1     |
| PUM2    | TAF5       | CPSF6     | SH2D3A    | ANAPC5       | PRDX4     |

\*J. Xue is Graduate Student, Department of Statistics, Texas A&M University, College Station, TX 77843; email: jnxue@stat.tamu.edu. F. Liang is professor, Department of Biostatistics, University of Florida, Gainesville, FL 32611, email: faliang@ufl.edu.

|            |            |            |           |              |           |
|------------|------------|------------|-----------|--------------|-----------|
| CPSF6      | NRF1       | RRAS       | PTPN6     | FANCE        | ARF3      |
| WEE1       | ORC1       | CAV2       | DAPP1     | ADAMTS19     | RH3B      |
| C14orf93   | CPSF6      | KLHL8      | FAM83F    | LDOC1        | CDC42SE2  |
| ZNF124     | CD63       | RHOC       | INADL     | LOC100507000 | DMKN      |
| UPP1       | SLFN11     | CTSL1      | FAAH2     | APOA1BP      | APOO      |
| C9orf38    | B4GALT4    | ZBED4      | LSR       | GRM8         | TET3      |
| S100A10    | PRPF38A    | UPP1       | SYTL1     | GNAZ         | PBX2      |
| BLM        | RFXAP      | PXDC1      | MAP7      | MBTD1        | PXK       |
| TKI258     | PHA-665752 | Nutlin-3   | PF2341066 | Panobinostat | Sorafenib |
| S100A11    | GEMB1      | DNAJB14    | DUSP14    | MYOF         | FLI1      |
| F2RL1      | TRIP6      | SLC35D3    | PPP2R3A   | WWTR1        | SNAI2     |
| ALDH1A3    | C3orf19    | FANCL      | MYOF      | CYR61        | C9orf3    |
| EXOSC9     | FAXC       | LOC285548  | PERP      | TNFRF12A     | CPSF6     |
| KIAA1671   | FAM83D     | CCDC30     | BAIAP2L1  | ANXA2        | LAIR1     |
| DDR1       | FDXACB1    | GABPB1     | CPSF6     | ARSJ         | RPL22     |
| PKP3       | KIF16B     | ATXN7      | CEP44     | S100A10      | SIN3A     |
| CTTN       | SYAP1      | MDM2       | GPR56     | ZBED4        | EGFR      |
| MYO5B      | C4orf29    | MDH1       | HGF       | ITGA3        | RPIA      |
| INPP5B     | VHL        | MRGPRX3    | TNFAIP1   | GPX8         | NCBP2     |
| PD-0325901 | PD-0332991 | Paclitaxel | PLX4720   | RAF265       | Rank      |
| DUSP6      | GPX8       | TAF5       | EPCAM     | EXOSC9       | 1         |
| ITGA6      | CAV2       | ILF3       | ECT2      | MYO5B        | 2         |
| NPAS2      | COX18      | MCM2       | PRKCB     | SEPT10       | 3         |
| ETV4       | EPHA2      | SPEN       | VPS33B    | VASN         | 4         |
| LYZ        | GPRC5A     | NASP       | CD200     | DDR1         | 5         |
| C9orf167   | PLK2       | HNRNPL     | LARGE     | INPP5B       | 6         |
| RNF125     | RPAS       | SNRPA      | DSC2      | F2RL1        | 7         |
| CMTM7      | TSEN34     | CPSF6      | SUSD4     | SEPT6        | 8         |
| PHLDA1     | MYOF       | KDM1A      | MMP28     | ENTPD2       | 9         |
| NUDT4      | HDHD2      | SSRP1      | NUDT4     | SNRPD1       | 10        |
